# Supplementary material for: Sensory Responsive Environments: A Qualitative Study on Perceived Relationships between Outdoor Built Environments and Sensory Sensitivities
Source: MDPI journal article supplement (doi:10.3390/land13050636), 2024-05-08
Supplement: s1 [file s1]

Archive with 2 entries (2 files):
- File S1. INTERVIEW_PROTOCOL.pdf
- File S2. IRB CERTIFICATION.pdf
