# Supplementary material for: Sensory Responsive Environments: A Qualitative Study on Perceived Relationships between Outdoor Built Environments and Sensory Sensitivities
Source: MDPI journal article supplement (doi:10.3390/land13050636), 2024-05-08
Supplement: s1 [file s1]

## **Certificate of Exemption**

04-Jan-2023

|                            |                                                                                               |
|----------------------------|-----------------------------------------------------------------------------------------------|
| <b>Title:</b>              | Thesis - Neuro-Inclusive Spaces: Designing Acoustically and Sensorially Supportive Landscapes |
| <b>COMIRB#:</b>            | 22-2175                                                                                       |
| <b>Investigator:</b>       | Kathryn Finnigan                                                                              |
| <b>Subject:</b>            | Initial Application                                                                           |
| <b>Funding Source(s):</b>  | No Sponsor~                                                                                   |
| <b>Panel:</b>              | UCD Panel S                                                                                   |
| <b>Effective Date:</b>     | 04-Jan-2023                                                                                   |
| <b>Exemption Category:</b> | 2                                                                                             |
| <b>Submission ID:</b>      | APP001-3                                                                                      |

---

### **SUBMISSION DESCRIPTION:**

Response to incomplete

---

**Your COMIRB Initial submission APP001-3 has been determined to be EXEMPT from IRB review.** There is no requirement for continuing review and your study has not been given an expiration date.

For the duration of your protocol, any change to the Principal Investigator, or any changes that may affect the exemption determination must be submitted to COMIRB before implementation of the changes. Information on how to submit changes (amendments) and reports of unanticipated problems for your study to COMIRB can be found on the COMIRB website <http://www.ucdenver.edu/research/comirb/submissions/>.

**When your research is complete, please notify COMIRB by e-mail at [COMIRB@ucdenver.edu](mailto:COMIRB@ucdenver.edu)**

### **REVIEW DETAILS:**

#### Category 2

This protocol meets the criteria for exempt Category 2, as it involves administration of surveys and interviews.

Please note that you are limited to 30 participants total. If you need additional participants, submit an amendment and update the application form.

**Click here to open your submission:** [Submission Page](#)
